# Supplementary material for: Sulphur and Nitrogen Fertilization as a Potential Means of Agronomic Biofortification to Improve the Content and Uptake of Microelements in Spring Wheat Grain DM
Source: Hindawi journal article supplement (doi:10.1155/2018/9326820), 2018-11-19
Supplement: f1 [file 9326820.f1.pdf]

## Supplementary Material

### Food biofortification

#### **Sulphur and nitrogen fertilization as a potential means of agronomic biofortification to improve the content and uptake of microelements in spring wheat grain DM**

Klikocka Hanna<sup>1</sup>, Marks Marek<sup>2</sup>

<sup>1</sup>Faculty of Agrobioengineering, Departament of Economics and Management, University of Life Science in Lublin, Poland, <sup>2</sup>Faculty of Environmental Management and Agriculture, Department of Agroecosystems, University of Warmia and Mazury in Olsztyn, Poland.

Correspondence should be addressed to Hanna Klikocka; hanna.klikocka@up.lublin.pl

**Table S1. Basic data for the preparation of the table 1**

| Combina-<br>tions | Year | Yield<br>DM | Fe<br>content | Fe<br>uptake | Mn<br>content | Mn<br>uptake | Zn<br>content | Zn<br>uptake | Cu<br>content | Cu<br>uptake |
|-------------------|------|-------------|---------------|--------------|---------------|--------------|---------------|--------------|---------------|--------------|
| N0S0              | 2009 | 33,56       | 40,5          | 135,9        | 33,6          | 112,7        | 30,4          | 102,0        | 3,2           | 10,74        |
|                   | 2010 | 34,94       | 37,1          | 129,6        | 35            | 122,3        | 26,9          | 94,0         | 3,09          | 10,80        |
|                   | 2011 | 38,59       | 38            | 146,6        | 36,4          | 140,5        | 35,8          | 138,1        | 3,16          | 12,19        |
| N0S50             | 2009 | 34,52       | 44            | 151,9        | 33,2          | 114,6        | 32,4          | 111,8        | 3,48          | 12,01        |
|                   | 2010 | 34,41       | 39,1          | 134,5        | 33,4          | 114,9        | 30            | 103,2        | 3,29          | 11,32        |
|                   | 2011 | 40,71       | 40            | 162,8        | 33,4          | 136,0        | 32,6          | 132,7        | 3,24          | 13,19        |
| N40S0             | 2009 | 36,00       | 44,5          | 160,2        | 34,6          | 124,6        | 32            | 115,2        | 3,57          | 12,85        |
|                   | 2010 | 34,73       | 38,3          | 133,0        | 36,2          | 125,7        | 28,2          | 97,9         | 3,16          | 10,97        |
|                   | 2011 | 39,38       | 39,3          | 154,8        | 38            | 149,7        | 36,1          | 142,2        | 3,27          | 12,88        |
| N40S50            | 2009 | 36,84       | 45            | 165,8        | 33,8          | 124,5        | 33,1          | 121,9        | 3,65          | 13,45        |
|                   | 2010 | 37,57       | 40,4          | 151,8        | 34,8          | 130,7        | 31,5          | 118,4        | 3,26          | 12,25        |
|                   | 2011 | 41,85       | 42,7          | 178,7        | 37,3          | 156,1        | 36,7          | 153,6        | 3,66          | 15,32        |
| N80S0             | 2009 | 47,84       | 45            | 215,3        | 35            | 167,4        | 33            | 157,9        | 3,65          | 17,46        |
|                   | 2010 | 44,23       | 40,5          | 179,1        | 38,3          | 169,4        | 29,8          | 131,8        | 3,29          | 14,55        |
|                   | 2011 | 50,42       | 40,1          | 202,2        | 41,4          | 208,7        | 37,8          | 190,6        | 3,44          | 17,34        |
| N80S50            | 2009 | 48,98       | 45,9          | 224,8        | 34,6          | 169,5        | 33,5          | 164,1        | 3,72          | 18,22        |
|                   | 2010 | 46,95       | 43,5          | 204,2        | 34,9          | 163,9        | 32            | 150,3        | 3,49          | 16,39        |
|                   | 2011 | 48,12       | 45,6          | 219,4        | 37,5          | 180,4        | 38,4          | 184,8        | 3,73          | 17,95        |
| N120S0            | 2009 | 48,18       | 47            | 226,4        | 35,8          | 172,5        | 34            | 163,8        | 3,79          | 18,26        |
|                   | 2010 | 48,12       | 42            | 202,1        | 38,8          | 186,7        | 30,4          | 146,3        | 3,47          | 16,70        |
|                   | 2011 | 48,82       | 42,4          | 207,0        | 42            | 205,1        | 38            | 185,5        | 3,83          | 18,70        |
| N120S50           | 2009 | 50,66       | 49            | 248,2        | 35,1          | 177,8        | 35            | 177,3        | 3,9           | 19,76        |
|                   | 2010 | 49,53       | 45            | 222,9        | 35,3          | 174,9        | 32,8          | 162,5        | 3,65          | 18,08        |
|                   | 2011 | 51,62       | 46,8          | 241,6        | 37,9          | 195,6        | 39,8          | 205,4        | 4             | 20,65        |
